# Supplementary material for: Modular Synthetic Inverters from Zinc Finger Proteins and Small RNAs
Source: PubMed Central journal article supplement (PMC4757538; doi:10.1371/journal.pone.0149483), 2016-02-17
Supplement: pone.0149483.s001.pdf [file pone.0149483.s001.pdf]

**S1 Table. Plasmids used in ZFP-sRNA inverter experiments.** Intermediate cloning plasmids first, followed by the final experimental plasmids. All plasmids were transformed into the strain DP10 [1].

| Name                 | Resistance | Origin  | Description                                                                                                                                                       |
|----------------------|------------|---------|-------------------------------------------------------------------------------------------------------------------------------------------------------------------|
| pWH29-77             | CmR        | SC101** | AraC on $P_C$ and ZFP16-59 on $P_{BAD}$ .                                                                                                                         |
| pWH32-32             | KanR       | ColE1   | mCherry on RPL-83 with op-3.                                                                                                                                      |
| pWH18-29             | CmR        | p15a    | GFP on pJ23119 with sLS. Used to get sLS.                                                                                                                         |
| pJH4-21              | KanR       | p15a    | Operons from pWH29-77 and pWH32-32 moved onto KanR/p15a vector with sLS added to ZFP16-59 and mCherry terminator changed. The basis for the ZFP inverter plasmid. |
| pJH5-57              | KanR       | p15a    | pJH4-21 with sLS changed to s04.                                                                                                                                  |
| pWH16-57             | AmpR       | ColE1   | Plasmid from William Holtz with ZFP16-57.                                                                                                                         |
| pWH16-56             | AmpR       | ColE1   | Plasmid from William Holtz with ZFP16-56.                                                                                                                         |
| pWH39-21<br>pWH39-40 | CmR        | ColE1   | Twenty plasmids with aLS on numerically-ordered promoters J23100 to J23119. The bases for the sRNA plasmids.                                                      |
| VKM40                | AmpR       | ColE1   | Plasmid from Vivek Mutalik with a04 on $P_{LlacO-1}$ and LacI. Used to get a04; a05 made from a04 via cloning.                                                    |
| pJH1-81              | KanR       | p15a    | Empty plasmid.                                                                                                                                                    |
| pWH17-39             | CmR        | ColE1   | Empty plasmid.                                                                                                                                                    |
| pJH4-37              | KanR       | p15a    | AraC on $P_C$ and mRFP1 on $P_{BAD}$ for input measurement. Originally pBbA8k-RFP [2].                                                                            |
| pJH7-17              | KanR       | p15a    | ZFP inverter plasmid with ZFP16-59, op-3, RPL-83, s04.                                                                                                            |
| pJH7-59              | KanR       | p15a    | ZFP inverter plasmid with ZFP16-59, op-3, RPL-83, s05.                                                                                                            |
| pJH4-40              | KanR       | p15a    | ZFP inverter plasmid with ZFP16-59, op-3, RPL-83, sLS.                                                                                                            |
| pJH9-55              | KanR       | p15a    | ZFP inverter plasmid with ZFP16-57, op-18, RPL-69, s04.                                                                                                           |
| pJH9-56              | KanR       | p15a    | ZFP inverter plasmid with ZFP16-57, op-18, RPL-69, s05.                                                                                                           |
| pJH9-52              | KanR       | p15a    | ZFP inverter plasmid with ZFP16-57, op-18, RPL-69, sLS.                                                                                                           |
| pJH7-57              | KanR       | p15a    | ZFP inverter plasmid with ZFP16-56, op-30, RPL-83, s04.                                                                                                           |
| pJH7-60              | KanR       | p15a    | ZFP inverter plasmid with ZFP16-56, op-30, RPL-83, s05.                                                                                                           |
| pJH4-64              | KanR       | p15a    | ZFP inverter plasmid with ZFP16-56, op-30, RPL-83, sLS.                                                                                                           |
| pJH5-56              | CmR        | ColE1   | sRNA plasmid with J23108 and a04.                                                                                                                                 |
| pJH6-26              | CmR        | ColE1   | sRNA plasmid with J23118 and a05.                                                                                                                                 |
| pWH39-27             | CmR        | ColE1   | sRNA plasmid with J23106 and aLS.                                                                                                                                 |
| pJH6-63              | KanR       | p15a    | Two ZFP inverter plasmid with ZFP16-56, op-30, RPL-83, s04 targeting ZFP16-59, op-3, RPL-83, s05.                                                                 |
| pJH7-42              | CmR        | ColE1   | Two sRNA plasmid with a04 on J23108 and a05 on J23118.                                                                                                            |
| pJH8-51              | KanR       | p15a    | Plasmid 1* with ZFP16-59, op-3, RPL-83, s04/s05.                                                                                                                  |
| pJH7-61              | KanR       | p15a    | Plasmid 3* with ZFP16-56, op-30, RPL-83, s04 targeting mCherry, s05.                                                                                              |

## References

1. Kizer L, Pitera DJ, Pfleger BF, Keasling JD. Application of Functional Genomics to Pathway Optimization for Increased Isoprenoid Production. *Applied and Environmental Microbiology*. 2008;74(10):3229–3241.
2. Lee TS, Krupa RA, Zhang F, Hajimorad M, Holtz WJ, Prasad N, et al. BglBrick vectors and datasheets: A synthetic biology platform for gene expression. *Journal of Biological Engineering*. 2011;5(1):1–14.
