# Supplementary material for: Modular Synthetic Inverters from Zinc Finger Proteins and Small RNAs
Source: PubMed Central journal article supplement (PMC4757538; doi:10.1371/journal.pone.0149483), 2016-02-17
Supplement: pone.0149483.s002.pdf [file pone.0149483.s002.pdf]

**S2 Table. Oligonucleotides used in the construction of the ZFP-sRNA inverter plasmids.** Here “for” denotes a forward primer, “rev” denotes a reverse primer, and “RTH” indicates use in Round-the-horn site-directed mutagenesis. Bases highlighted in bold font indicate the specific regions being changed.

| Name  | Description                          | Sequence                                                                |
|-------|--------------------------------------|-------------------------------------------------------------------------|
| o4-63 | ZFP swap pJH4-40vec for (to op-18)   | cctatcagctgctgcttcttctatt <b>gggagatagtgggagag</b> ttgacaattaatcatcgg   |
| o4-69 | ZFP swap pJH4-40vec for (to op-30)   | cctatcagctgctgcttcttctatt <b>tagtgggaaggaatgggag</b> ttgacaattaatcatcgg |
| o4-64 | ZFP swap pJH4-40vec rev (RBS AAAGGA) | cctggtccagcatagatcctatcctttagatc                                        |
| o4-65 | ZFP pWH16-56/57 for                  | tagccggttgtaaggatctaaaggataggatctatgctggaaccaggatc                      |
| o4-66 | ZFP pWH16-56/57 rev                  | gctggagatccttactcgagtttgatccttattaagaggtttagatc                         |
| o4-67 | ZFP swap pJH4-40 term spacer for     | ggatccaaactcgagtaaggatctccaggc                                          |
| o4-68 | ZFP swap pJH4-40 term spacer rev     | atagaaagcacgcagctgatagggtcga                                            |
| o7-45 | RTH s04/s05 RBS for                  | <b>nn</b> agacaacaagatgtgcgaactcgatgctggaac                             |
| o2-14 | RTH s04 RBS rev                      | ttattgattttggcatggagaaacagtagag                                         |
| o7-74 | RTH s05 RBS rev                      | ttattgattttacgatggagaaacagtagag                                         |
| o3-42 | vec sLS RBS lib rev                  | agatccttacaaccggctattagagtagc                                           |
| o3-43 | vec sLS RBS lib for                  | aggatctatgctggaaccaggatc                                                |
| o9-23 | sLS RBS lib                          | gatcctggttccagcatagatcct <b>annyyyy</b> agatccttacaaccggctattagagtagc   |
| o7-24 | RTH op rev                           | atagaaagcacgcagctgatagggtcga                                            |
| o7-25 | RTH op-3 for (RPL-83)                | <b>gagaggaagggagagg</b> ttgacaattaatcatcggctcataacc                     |
| o7-81 | RTH op-18 for (RPL-83)               | <b>tgggagatagtgggagag</b> ttgacaattaatcatcggctcataacc                   |
| o7-80 | RTH op-30 for (RPL-83)               | <b>tagtgggaaggaatgggag</b> ttgacaattaatcatcggctcataacc                  |
| o9-24 | RTH RPL-83 to 69 for                 | tgtggaacaattcattaagaggagaaaggtac                                        |
| o9-25 | RTH RPL-83 to 69 rev (op-18)         | taccctacgagccgatgattaattgtcaactctcc                                     |
| o6-19 | vec pWH39-29 for                     | ggatcctaactcgagtaaggatctccaggca                                         |
| o6-20 | vec pWH39-29 rev (pJ23108)           | gctagcattatacctaggactgagctagctgtcaga                                    |
| o6-21 | a04 from VKM40 for                   | agctcagctcaggtataatgctagctcgacatcttgttctgatta                           |
| o6-22 | a04 from VKM40 rev                   | gagatccttactcgagttaggatccctgatgaatcccctaatgatttg                        |
| o6-34 | RTH a04/a05 rev                      | aaatcaataatcagacaacaagatgtgca                                           |
| o6-35 | RTH a05 for                          | <b>tacg</b> cgaaaccatttgatcatatgacaagatgtg                              |
| o1-6  | RTH to pJ23118 for                   | cggtagctcagtcctaggtattgtgctagctcgacatcttgttctg                          |
| o6-49 | RTH to pJ23118 rev                   | tcaaacgtgccagatcttagaattcgatatctg                                       |
| o6-23 | RTH to s04/s05 for                   | caacaagatgtgcgaactcgatgctggaaccaggatc                                   |
| o6-24 | RTH to s04 rev (RBS TC)              | tct <b>gattattgattttg</b> catggagaaacagtagagagttgc                      |
| o6-37 | RTH to s05 rev (RBS TC)              | tct <b>gattattgattttac</b> gcatggagaaacagtagagagttgc                    |
